# Supplementary material for: Effective treatment of mitochondrial myopathy by nicotinamide riboside, a vitamin B3
Source: PubMed Central journal article supplement (PMC4203351; doi:10.1002/emmm.201403943), 2014-04-07
Supplement: emmm0006-0721-sd1.pdf [file emmm0006-0721-sd1.pdf]

## Supplementary Information

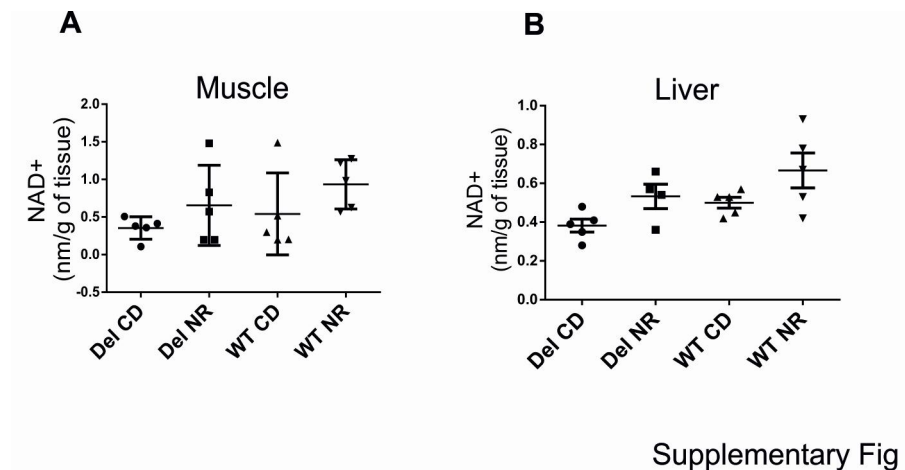

Supplementary Fig 1

**Supplementary Figure 1. NR effects on NAD<sup>+</sup> levels.** NAD<sup>+</sup> levels in (A) skeletal muscle and (B) Liver in nicotinamide riboside (NR)- or chow diet (CD)-fed Deletor (Del) and wild type (WT) mice. A, ultra performance liquid chromatography and triple quadrupole mass spectrometry; B, high performance liquid chromatography.
