# Supplementary material for: Effective treatment of mitochondrial myopathy by nicotinamide riboside, a vitamin B3
Source: PubMed Central journal article supplement (PMC4203351; doi:10.1002/emmm.201403943), 2014-04-07
Supplement: emmm0006-0721-sd7.pdf [file emmm0006-0721-sd7.pdf]

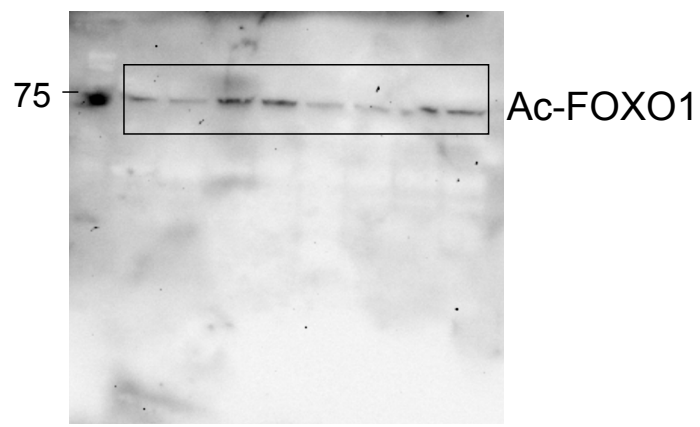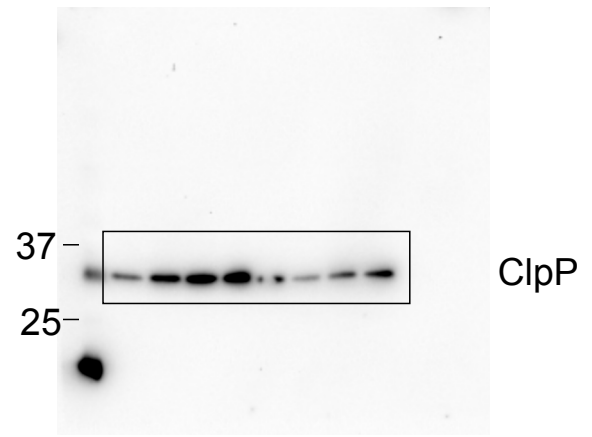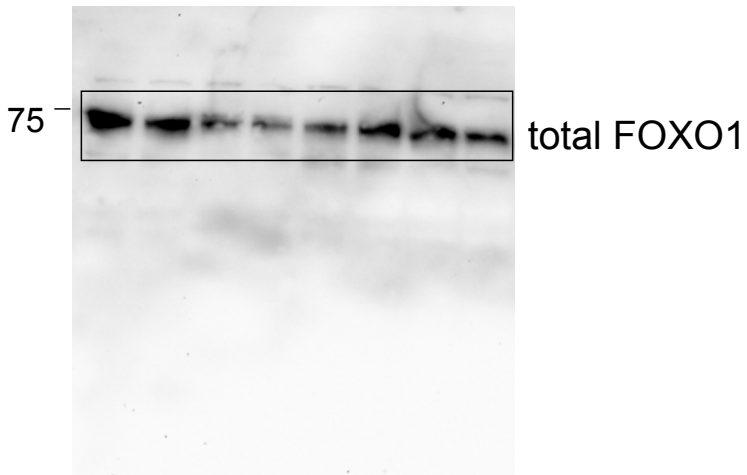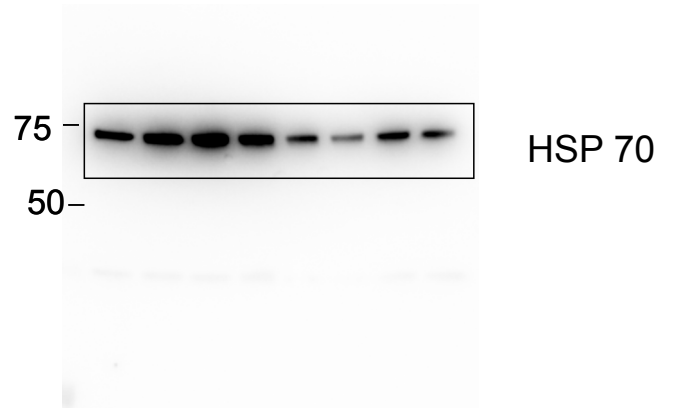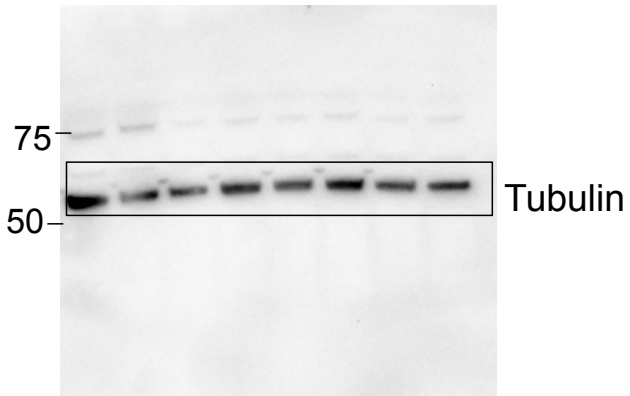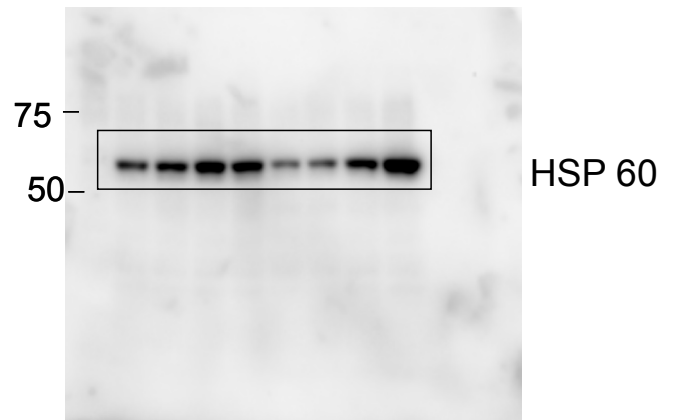

Fig 4A

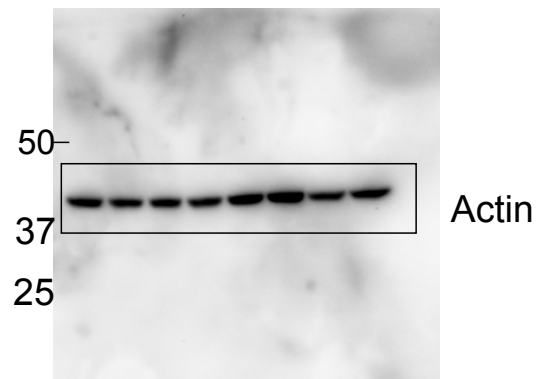

Fig 4G
